# Supplementary figures and images for: Role of the left aortic arch and blood flows in embryonic American alligator (Alligator mississippiensis)
Source: PubMed Central journal article supplement — J Comp Physiol B. 2010 Oct 30;181(3):391–401. doi: 10.1007/s00360-010-0494-6 (PMC3058339; doi:10.1007/s00360-010-0494-6), 2010-10-30

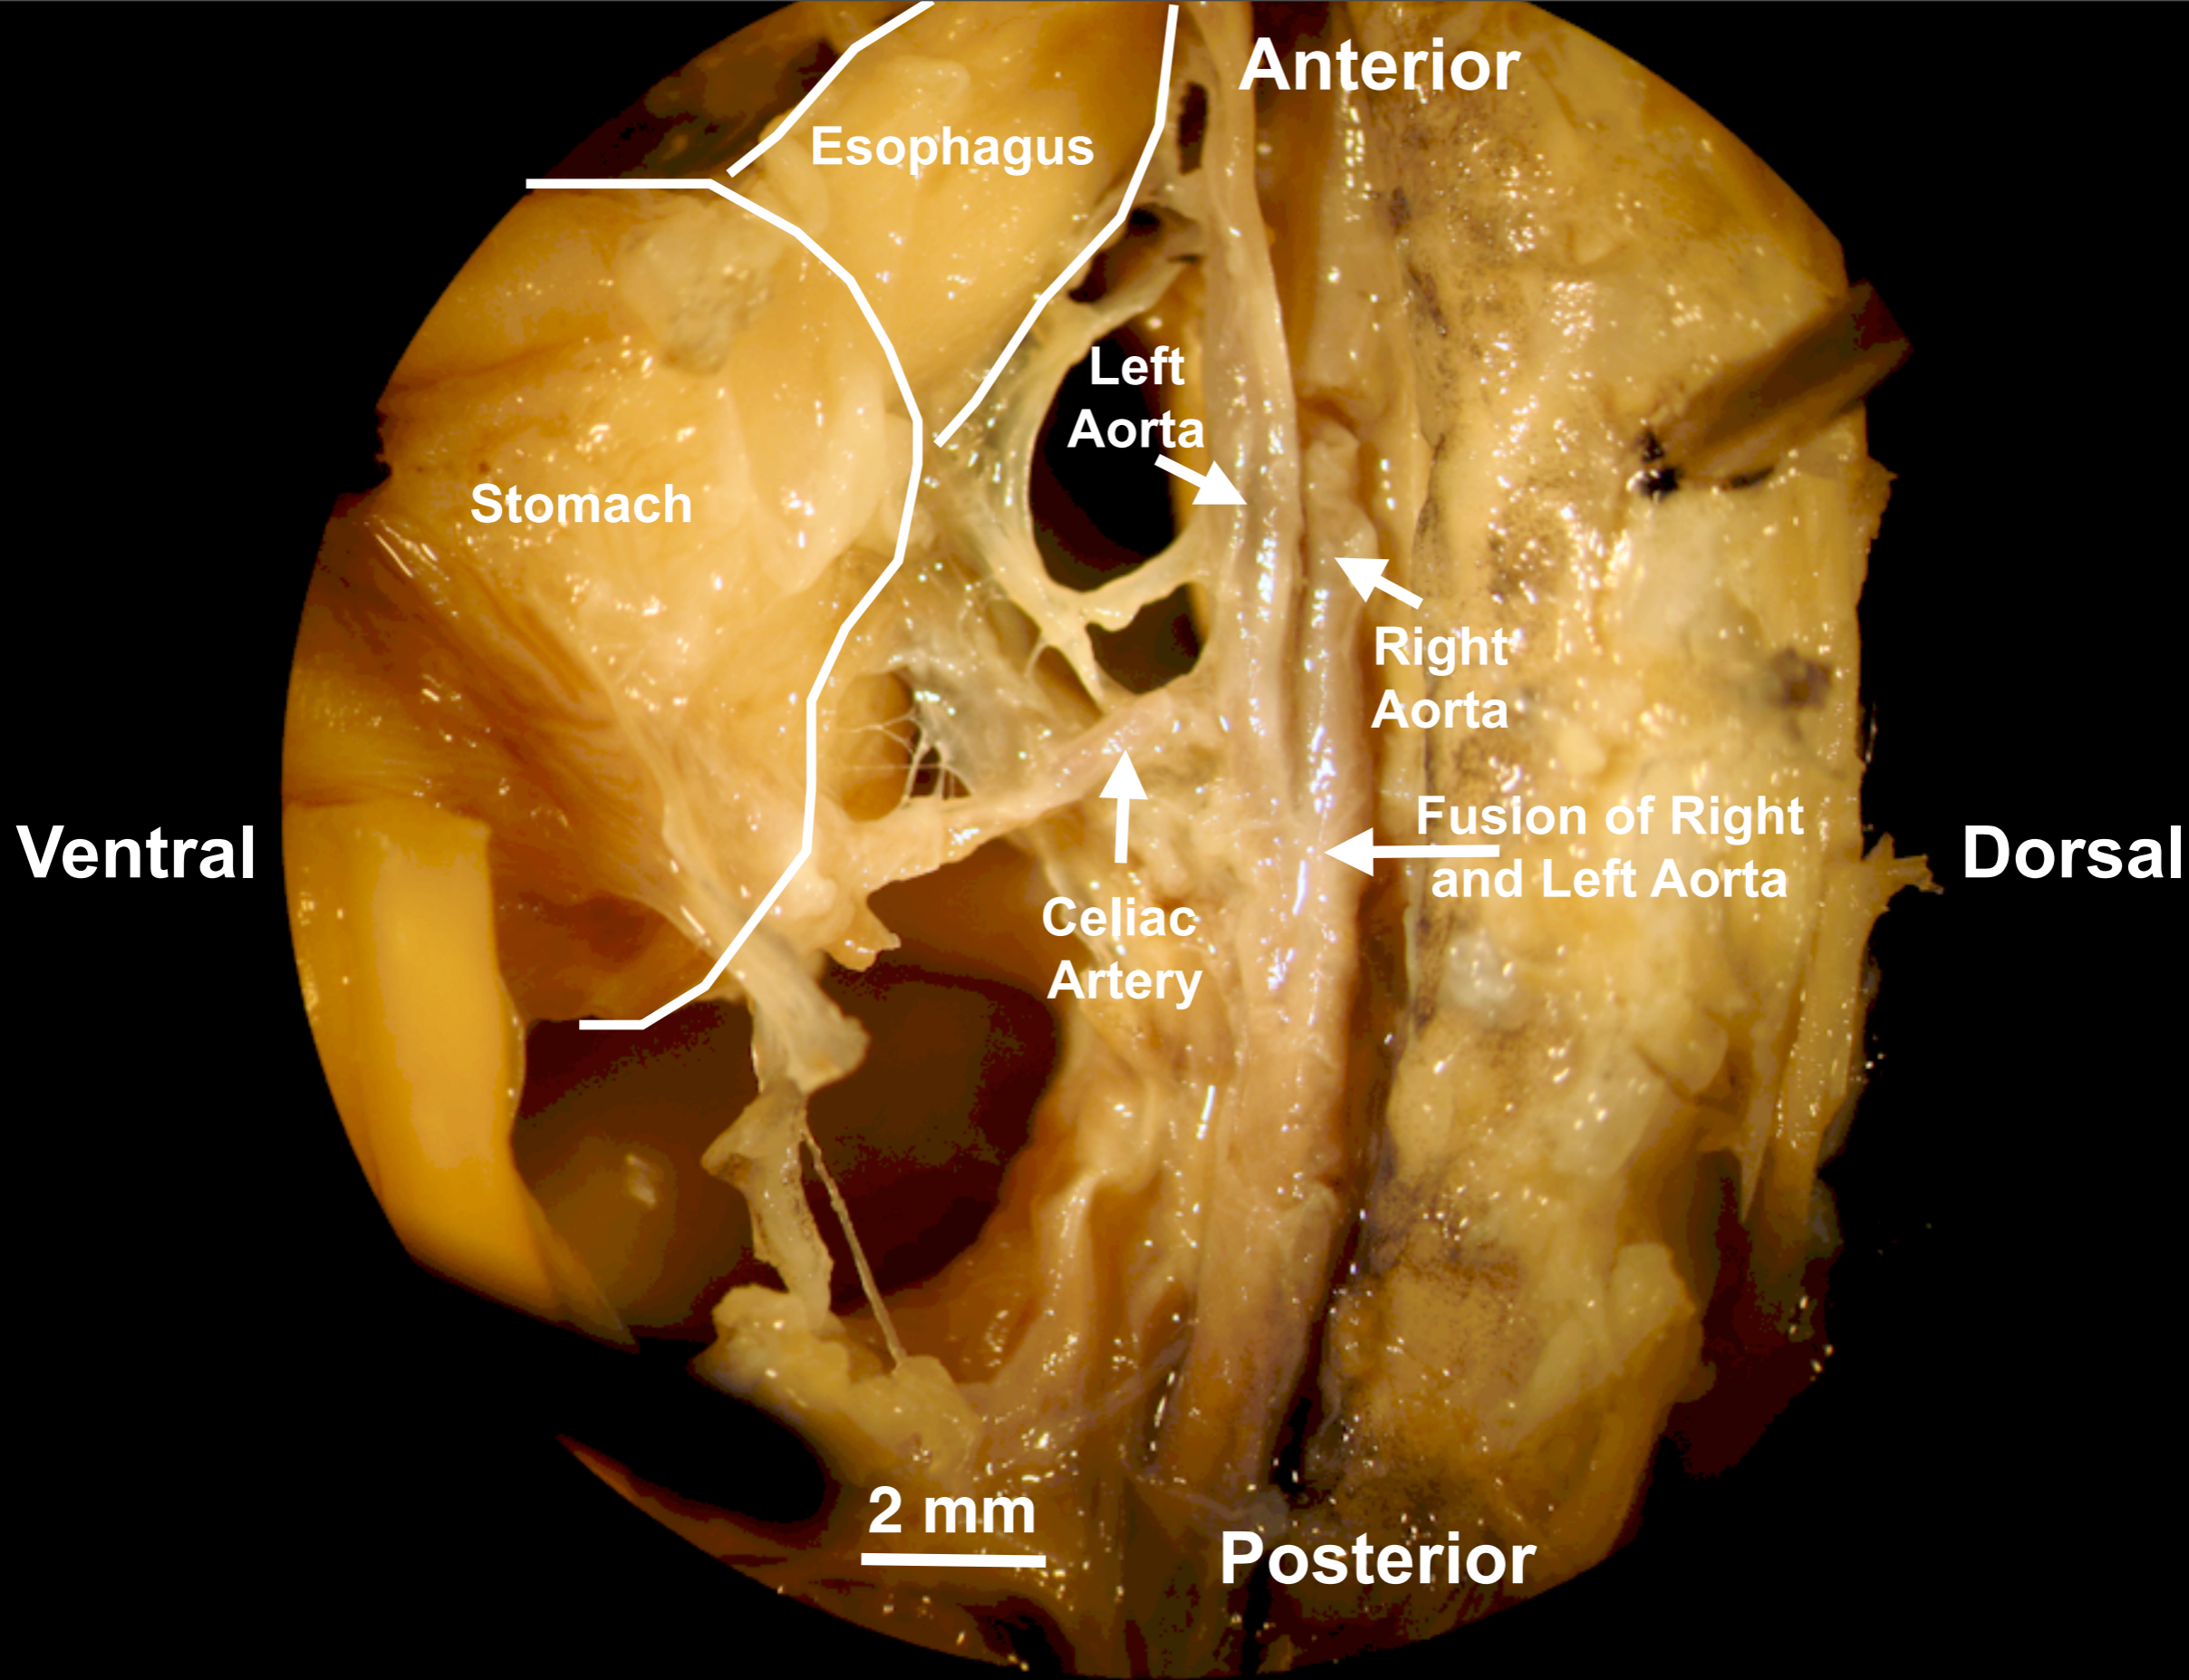

Supplement: 360_2010_494_MOESM2_ESM.pdf [file 360_2010_494_MOESM2_ESM.pdf]
